# Supplementary material
Source: Royal Society of Chemistry journal article supplement (doi:10.1039/d6qi00251j)
Supplement: d6qi00251j1.pdf [file d6qi00251j1.pdf]

## Supporting Information

### **In-Situ Dual-Site Passivation of All-Inorganic Perovskite Quantum Dots Using Zwitterionic Taurine for Enhanced Defect Resistance**

Jun Ho Choi<sup>1,†</sup>, Jin Young Kim<sup>2,†</sup>, Yu Min Lee<sup>2</sup>, Huiseong Lee<sup>1</sup>, Jeong Wan Park<sup>2</sup>, and Dong Hwan Wang<sup>1,2,\*</sup>

<sup>1</sup>School of Integrative Engineering, Chung-Ang University, 84 Heukseok-ro, Dongjak-gu, Seoul 06974, Republic of Korea

<sup>2</sup>Department of Intelligent Semiconductor Engineering, Chung-Ang University, 84 Heukseok-ro, Dongjak-gu, Seoul 06974, Republic of Korea

\*Corresponding author: king0401@cau.ac.kr (D. H. Wang)

†These authors contributed equally to this work.

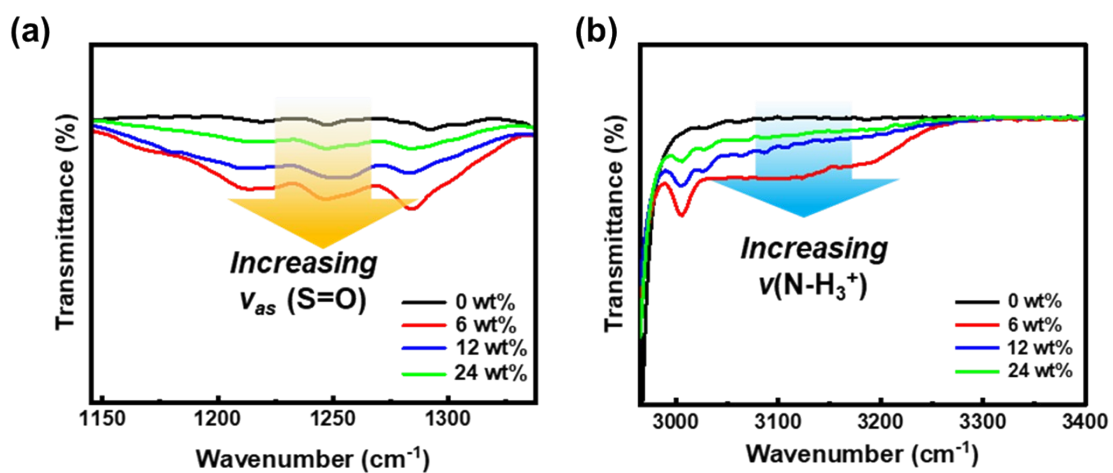

**Fig. S1.** FT-IR spectra of taurine-CsPbBr<sub>3</sub> PQDs with varying taurine concentrations (0, 6, 12, and 24 wt%), showing (a) the asymmetric stretching vibration of sulfonate groups  $\nu_{as}(S=O)$  and (b) the stretching vibration of ammonium groups  $\nu(N-H_3^+)$ .

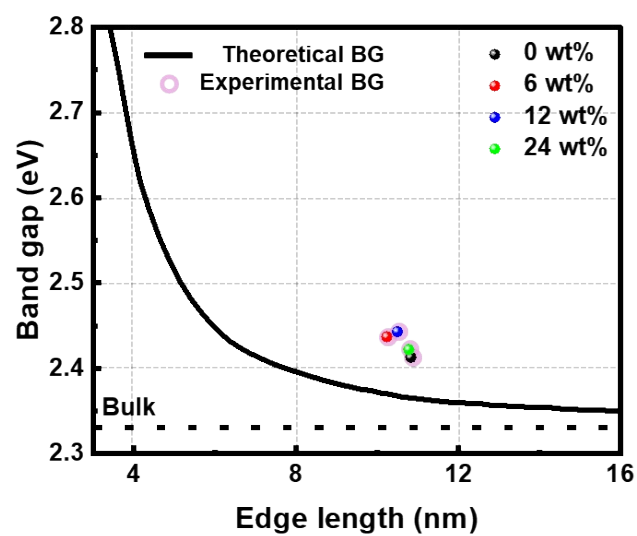

**Fig. S2.** Size-dependent bandgap evolution of CsPbBr<sub>3</sub> PQDs in quantum confinement. (Solid line: theoretical bandgap, symbols: experimental bandgap)

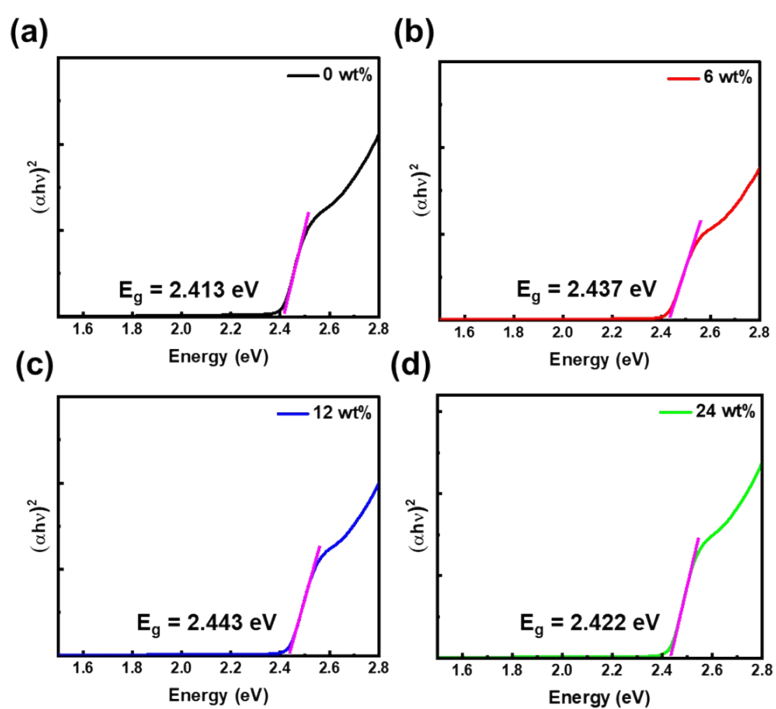

**Fig. S3.** Tauc plots for optical bandgap determination of CsPbBr<sub>3</sub> PQDs with different taurine concentrations (0, 6, 12 and 24 wt%).

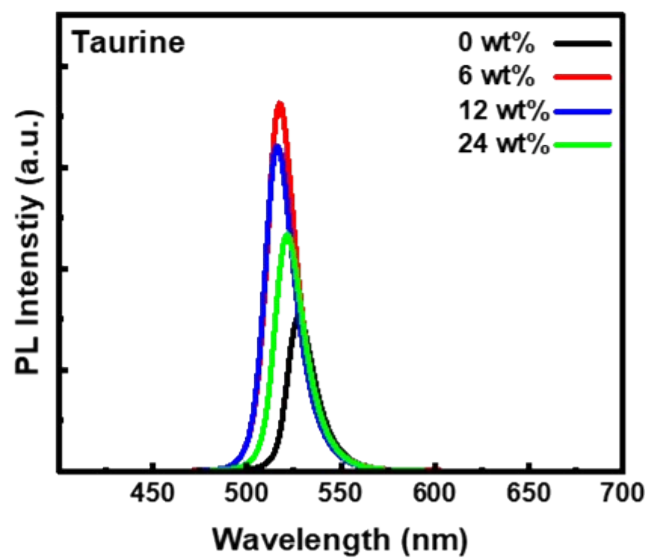

**Fig. S4.** PL spectra of taurine–CsPbBr<sub>3</sub> PQDs with different taurine contents (0, 6, 12, and 24 wt%).

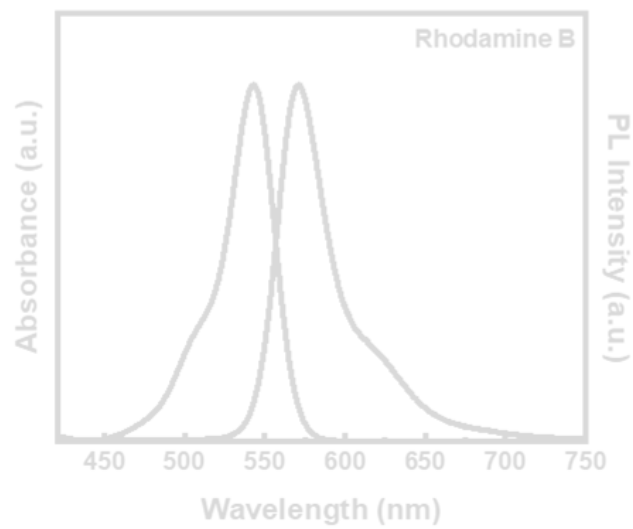

**Fig. S5.** UV-vis absorption and PL spectra of rhodamine B in ethanol used for relative QY calculations.

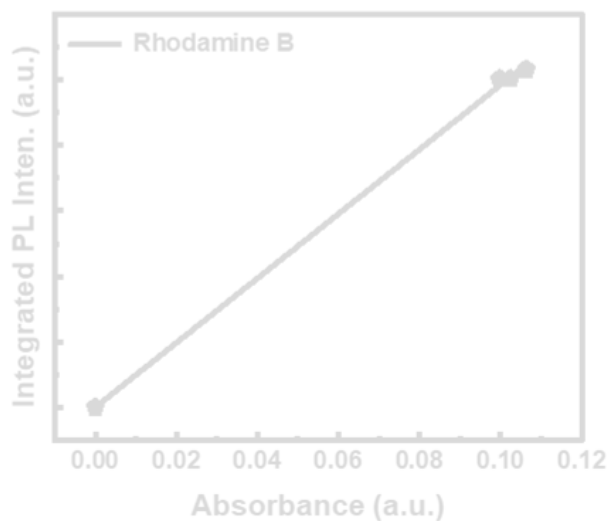

**Fig. S6.** PL intensity gradient of rhodamine B solutions in ethanol for relative QY determination.

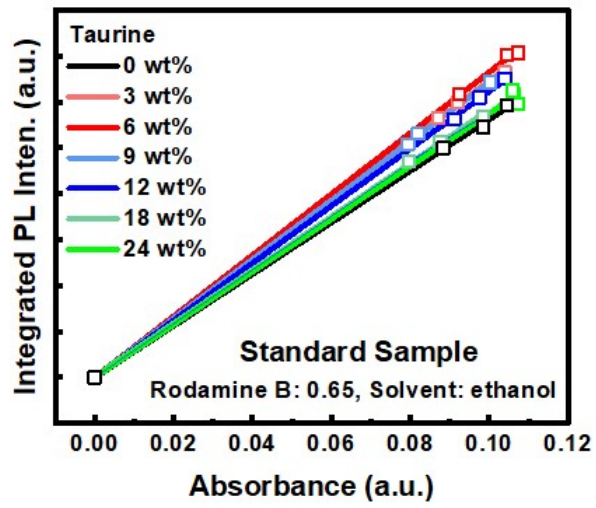

**Fig. S7.** Relative QY analysis used to optimize taurine concentration in CsPbBr<sub>3</sub> PQDs.

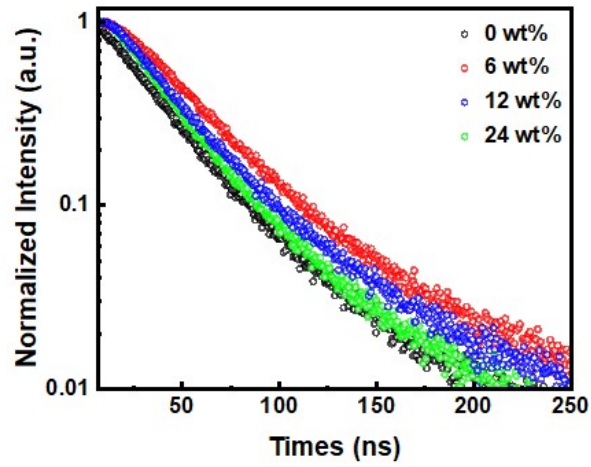

**Fig. S8.** Time-resolved photoluminescence (TRPL) decay curves of CsPbBr<sub>3</sub> PQDs with different taurine concentrations (0, 6, 12, and 24 wt%).

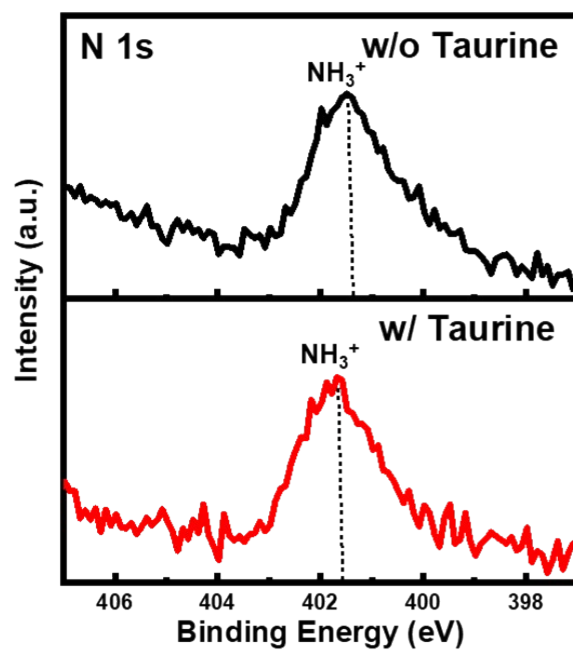

**Fig. S9.** XPS spectra of CsPbBr<sub>3</sub> PQDs with 0 and 6 wt% taurine of N 1s.

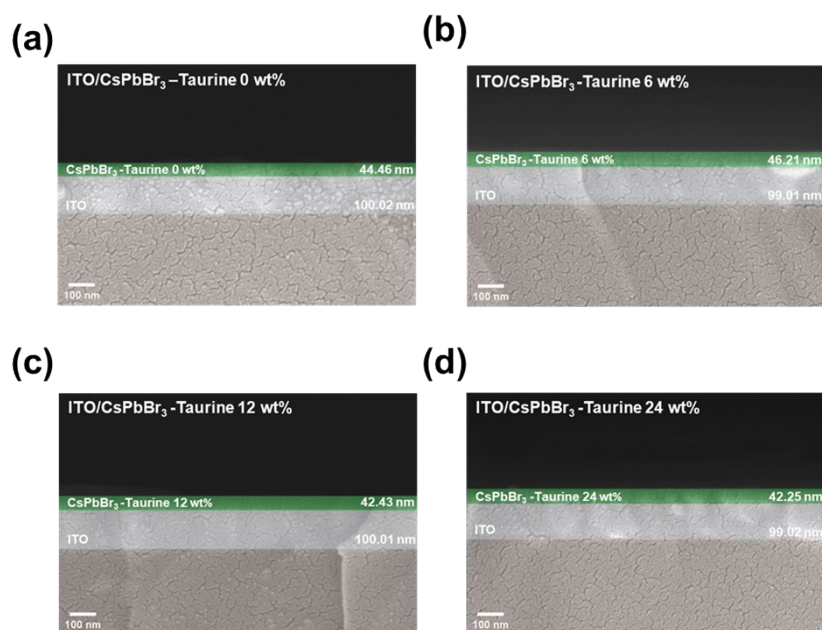

**Fig. S10.** FE-SEM cross-sectional images of taurine-CsPbBr<sub>3</sub> PVD films with varying taurine concentrations: (a) 0, (b) 6, (c) 12, and (d) 24 wt%.

**Table S1.** XRD diffraction peak positions ( $2\theta$ , °) of CsPbBr<sub>3</sub> PQDs with different taurine concentrations corresponding to the (100), (110), (200), (211), and (220) lattice planes.

| Taurine | Lattice Plane $2\theta$ (°) |       |       |       |       |
|---------|-----------------------------|-------|-------|-------|-------|
|         | (100)                       | (110) | (200) | (211) | (220) |
| 0 wt%   | 15.04                       | 21.49 | 30.36 | 37.33 | 43.47 |
| 6 wt%   | 15.33                       | 21.58 | 30.65 | 37.73 | 43.80 |
| 12 wt%  | 15.24                       | 21.56 | 30.67 | 37.64 | 43.78 |
| 24 wt%  | 15.19                       | 21.53 | 30.72 | 37.78 | 43.78 |

**Table S2.** PL peak position and FWHM of CsPbBr<sub>3</sub> PQDs with varying taurine concentrations.

| Taurine | PL peak position (nm) | FWHM (nm) |
|---------|-----------------------|-----------|
| 0 wt%   | 527.6                 | 19.98     |
| 6 wt%   | 517.3                 | 17.27     |
| 12 wt%  | 516.6                 | 18.59     |
| 24 wt%  | 521.2                 | 20.03     |

**Table S3.** Parameters used for the relative QY calculation of rhodamine B.

| Sample      | Refractive index | Gradient (F/A)     | Quantum yield |
|-------------|------------------|--------------------|---------------|
| Rhodamine B | 1.370            | $0.98 \times 10^5$ | 0.650         |

**Table S4.** Summary of QY calculation parameters for taurine concentration.

| Taurine | Solvent | Refractive Index | Gradient (F/A)     | Quantum Yield |
|---------|---------|------------------|--------------------|---------------|
| 0 wt%   | Hexane  | 1.375            | $1.13 \times 10^5$ | 72.3%         |
| 3 wt%   | Hexane  | 1.375            | $1.28 \times 10^5$ | 82.0%         |
| 6 wt%   | Hexane  | 1.375            | $1.33 \times 10^5$ | 86.7%         |
| 9 wt%   | Hexane  | 1.375            | $1.29 \times 10^5$ | 83.6%         |
| 12 wt%  | Hexane  | 1.375            | $1.25 \times 10^5$ | 81.1%         |
| 18 wt%  | Hexane  | 1.375            | $1.16 \times 10^5$ | 76.1%         |
| 24 wt%  | Hexane  | 1.375            | $1.15 \times 10^5$ | 75.0%         |

**Table S5.** Surface energies of CsPbBr<sub>3</sub> PQDs films with varying taurine concentrations, determined using the Owens–Wendt method.

| Taurine | $\gamma^p$ [mJ/m <sup>2</sup> ] | $\gamma^d$ [mJ/m <sup>2</sup> ] | $\gamma$ [mJ/m <sup>2</sup> ] |
|---------|---------------------------------|---------------------------------|-------------------------------|
| 0 wt%   | 11.82                           | 43.98                           | 55.79                         |
| 6 wt%   | 8.89                            | 42.08                           | 50.97                         |
| 12 wt%  | 11.56                           | 42.95                           | 54.50                         |
| 24 wt%  | 11.98                           | 43.09                           | 55.07                         |

**Table S6.** Summary of synthesis methods and optoelectronic properties of taurine-based and reported zwitterionic ligand based-CsPbBr<sub>3</sub> QDs.

| Materials                                                    | QY    | Air stability         | Water or polar stability       | Trap density [# cm <sup>-3</sup> ] | Reference                                                 |
|--------------------------------------------------------------|-------|-----------------------|--------------------------------|------------------------------------|-----------------------------------------------------------|
| 4-bromo-butyric acid (BBA)                                   | 86.4% | -                     | 95.03%<br>(DIW-after 60 h)     | -                                  | <i>Angew. Chem. Int. Ed.</i> <b>2022</b> , 61, e202116702 |
| 3-(N,N-dimethyloctadecyl ammonio) propane sulfonate (ASC 18) | 92%   | 84.3%<br>(after 24 h) | 76%<br>(ethanol-after 100 min) | -                                  | <i>Chem.Eng. J.</i> <b>2024</b> , 498, 155515             |
| zwitterionic sulfobetaine (ZSB)                              | 70.2% | 80%<br>(after 400 h)  | -                              | -                                  | <i>Chem.Eng. J.</i> <b>2024</b> , 481, 148127             |
| 3-(decyldimethylammonio) propanesulfonate (DLPS)             | 98%   | 82%<br>(after 240h)   | -                              | 2.03 × 10 <sup>20</sup>            | <i>ACS Appl. Mater. Interfaces</i> 2024, 16, 10389–10397  |
| Taurine                                                      | 86.7% | 71%<br>(after 396 h)  | 92.8%<br>(DIW-after 60 h)      | 5.21 × 10 <sup>16</sup>            | <b>This work</b>                                          |

## Reference

1. J. R. Martins, V. Krivenkov, C. R. Bernardo, P. Samokhvalov, I. Nabiev, Y. P. Rakovich and M. I. Vasilevskiy, Statistical Analysis of Photoluminescence Decay Kinetics in Quantum Dot Ensembles: Effects of Inorganic Shell Composition and Environment, *J Phys Chem C*, 2022, 126, 20480–20490.
